# Supplementary material for: CX3CL1/CX3CR1 axis attenuates early brain injury via promoting the delivery of exosomal microRNA-124 from neuron to microglia after subarachnoid hemorrhage
Source: PubMed Central journal article supplement (PMC7362528; doi:10.1186/s12974-020-01882-6), 2020-07-14
Supplement: 12974_2020_1882_MOESM1_ESM.pdf [file 12974_2020_1882_MOESM1_ESM.pdf]

# Supplementary material

## CX3CL1/CX3CR1 axis attenuates early brain injury via promoting the delivery of exosomal microRNA-124 from neuron to microglia after subarachnoid hemorrhage

Supplemental Figure 1. The medical images of clinical samples.

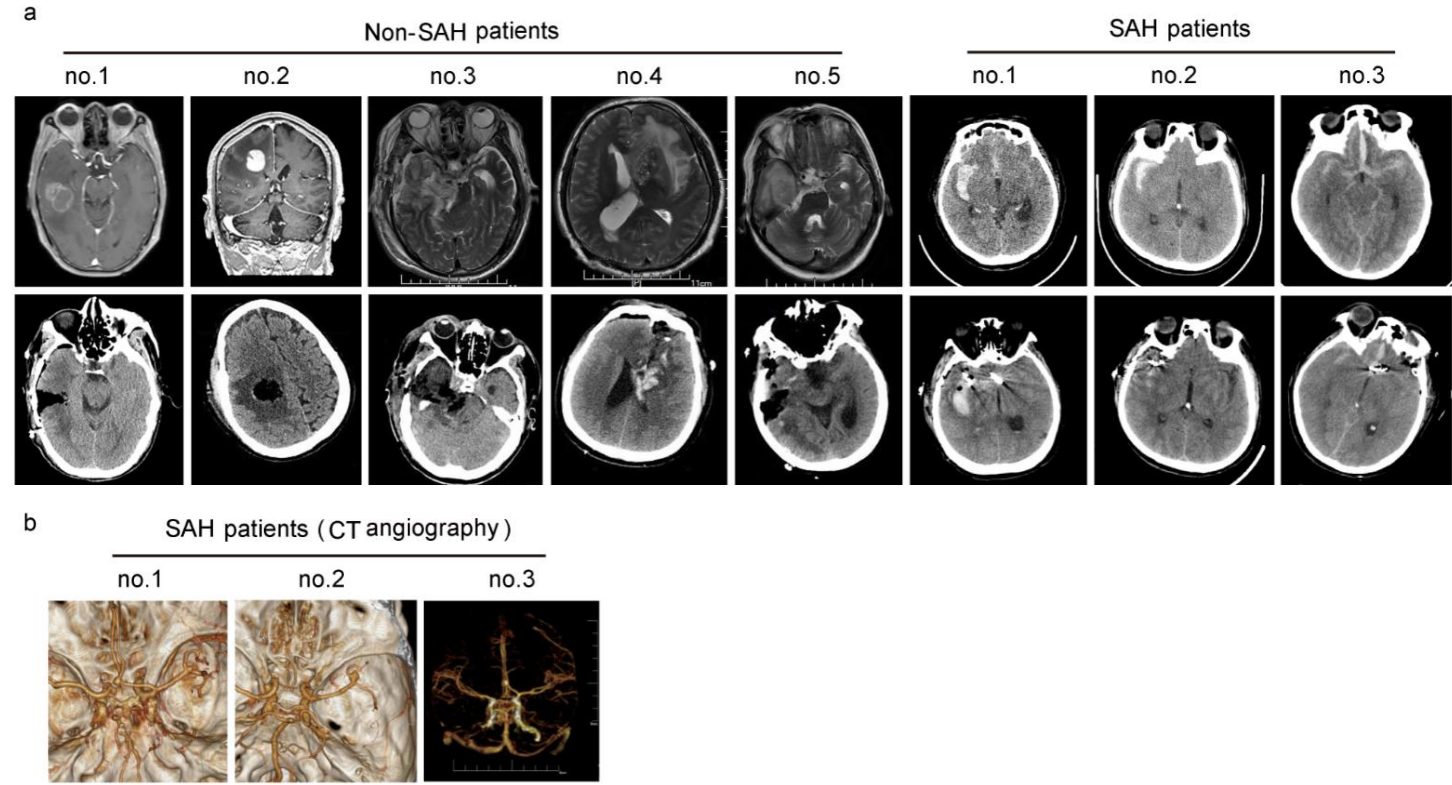

**Supplemental Table 1. The information of clinical samples.**

| Group   | No. | Age | Gender | Diagnosis                                      | GCS score | Hunt-hess rating | Operation time (day after SAH) | Part of the sample                                        | Prognosis |
|---------|-----|-----|--------|------------------------------------------------|-----------|------------------|--------------------------------|-----------------------------------------------------------|-----------|
|         | 1   | 63  | Male   | Metastatic encephaloma                         |           |                  |                                |                                                           |           |
|         | 2   | 68  | Male   | Metastatic encephaloma                         |           |                  |                                |                                                           |           |
| Non-SAH | 3   | 72  | Male   | Meningioma                                     |           |                  |                                |                                                           |           |
|         | 4   | 65  | Female | Glioma                                         |           |                  |                                |                                                           |           |
|         | 5   | 42  | Male   | Glioma                                         |           |                  |                                |                                                           |           |
|         | 1   | 72  | Female | Aneurysms rupture with subarachnoid hemorrhage | 3-5-6     | 3+1              | 7                              | Brain tissue around right middle cerebral artery aneurysm | Poor      |
| SAH     | 2   | 65  | Male   | Aneurysms rupture with subarachnoid hemorrhage | 4-5-6     | 1                | 1                              | Brain tissue around right middle cerebral artery aneurysm | Good      |
|         | 3   | 57  | Female | Aneurysms rupture with subarachnoid hemorrhage | 4-5-6     | 1                | 7                              | Brain tissue around anterior communicating artery         | Good      |

**Supplemental Table 2. Statistical table**

|        | Description      | Hours/days after SAH or sham surgery or OxyHb treatment | In vivo or vitro | Test used | Stat-value              | One- or two-tailed P value |
|--------|------------------|---------------------------------------------------------|------------------|-----------|-------------------------|----------------------------|
| Fig 2c | Relative protein | 3h, 6h, 12h, 24h,                                       | in vivo          | Ordinary  | F(6,35)=5.609, P<0.001; | Two-tailed                 |

|        |                                  |                           |         |                        |                                                                                                                                                                        |            |
|--------|----------------------------------|---------------------------|---------|------------------------|------------------------------------------------------------------------------------------------------------------------------------------------------------------------|------------|
|        | level of CX3CL1                  | 72h, 1w                   |         | one-way ANOVA          | Bonferroni's post hoc test, P=0.0078 (6h vs sham), P=0.0014 (12h vs sham); $\eta^2=0.4902$                                                                             |            |
| Fig 2d | Relative protein level of CX3CR1 | 3h, 6h, 12h, 24h, 72h, 1w | in vivo | Ordinary one-way ANOVA | F(6,34)=7.249, P<0.001; Bonferroni's post hoc test, P=0.0183 (6h vs sham), P=0.0174 (12h vs sham); $\eta^2=0.5019$                                                     | Two-tailed |
| Fig 3c | Relative protein level of CX3CL1 | 12h                       | in vivo | Ordinary one-way ANOVA | F(3,20)=15.97, P<0.001; Tukey's post hoc test, P<0.001 (SAH vs sham), P=0.0054 (OE vs Vector); $\eta^2=0.7055$                                                         | Two-tailed |
| Fig 3d | Relative protein level of CX3CR1 | 12h                       | in vivo | Ordinary one-way ANOVA | F(3,20)=9.868, P<0.001; Tukey's post hoc test, P=0.0085 (SAH vs sham), P=0.0043 (OE vs Vector); $\eta^2=0.5967$                                                        | Two-tailed |
| Fig 3f | FJC                              | 12h                       | in vivo | Ordinary one-way ANOVA | F(3,20)=136.3, P<0.001; Tukey's post hoc test, P<0.001 (SAH vs sham), P<0.001 (OE vs Vector); $\eta^2=0.9112$                                                          | Two-tailed |
| Fig 4a | Neurobehavioral scores           | 24h                       | in vivo | Mann-Whitney U test    | P<0.001 (SAH vs sham), P<0.001 (OE vs Vector)                                                                                                                          | Two-tailed |
| Fig 4b | Adhesive-removal time            | 1d, 3d, 7d, 14d           | in vivo | Two-way ANOVA          | F(3,36)=66.29, P<0.001; Tukey's post hoc test, P<0.001 (SAH vs sham), P=0.0027 (OE vs Vector); Bonferroni's post hoc test, P<0.001 (1d: OE vs Vector); $\eta^2=0.6866$ | Two-tailed |
| Fig 4c | Rotarod test                     | 1d, 3d, 7d, 14d           | in vivo | Two-way ANOVA          | F(3,36)=153, P<0.001; Tukey's post hoc test, P<0.001 (SAH vs sham), P<0.001 (OE vs Vector); Bonferroni's post hoc test, P=0.0048 (3d: OE vs Vector); $\eta^2=0.7270$   | Two-tailed |

|        |                                          |         |         |                              |      |                                                                                                                    |            |
|--------|------------------------------------------|---------|---------|------------------------------|------|--------------------------------------------------------------------------------------------------------------------|------------|
| Fig 4d | Escape latency                           | 22d-26d | in vivo | Two<br>ANOVA                 | -way | F(3,20)=59.54, P<0.001;<br>Tukey's post hoc test, P<0.001 (SAH vs sham), P<0.001 (OE vs Vector); $\eta^2=0.7899$   | Two-tailed |
| Fig 5b | Relative protein level of CD45           | 12h     | in vivo | Ordinary<br>one-way<br>ANOVA |      | F(3,20)=15.77, P<0.001;<br>Tukey's post hoc test, P<0.001 (SAH vs sham), P=0.0015 (OE vs Vector); $\eta^2=0.7029$  | Two-tailed |
| Fig 5c | Relative protein level of MHC Class II   | 12h     | in vivo | Ordinary<br>one-way<br>ANOVA |      | F(3,20)=13.44, P<0.001;<br>Tukey's post hoc test, P=0.0024 (SAH vs sham), P=0.0011 (OE vs Vector); $\eta^2=0.6687$ | Two-tailed |
| Fig 5d | Relative protein level of C/EBP $\alpha$ | 12h     | in vivo | Ordinary<br>one-way<br>ANOVA |      | F(3,20)=8.989, P<0.001;<br>Tukey's post hoc test, P=0.0075 (SAH vs sham), P=0.0081 (OE vs Vector); $\eta^2=0.5742$ | Two-tailed |
| Fig 5g | Relative protein level of MCPIP          | 12h     | in vivo | Ordinary<br>one-way<br>ANOVA |      | F(3,20)=8.37, P<0.001;<br>Tukey's post hoc test, P=0.0031 (SAH vs sham), P=0.0482 (OE vs Vector); $\eta^2=0.5566$  | Two-tailed |
| Fig 5h | Relative protein level of Runx1          | 12h     | in vivo | Ordinary<br>one-way<br>ANOVA |      | F(3,20)=9.627, P<0.001;<br>Tukey's post hoc test, P=0.0037 (SAH vs sham), P=0.0088 (OE vs Vector); $\eta^2=0.5911$ | Two-tailed |
| Fig 6a | Relative level of TNF- $\alpha$          | 12h     | in vivo | Ordinary<br>one-way<br>ANOVA |      | F(3,20)=75.18, P<0.001;<br>Tukey's post hoc test, P<0.001 (SAH vs sham), P<0.001 (OE vs Vector); $\eta^2=0.9185$   | Two-tailed |
| Fig 6b | Relative level of IL-1 $\alpha$          | 12h     | in vivo | Ordinary<br>one-way<br>ANOVA |      | F(3,20)=91.55, P<0.001;<br>Tukey's post hoc test, P<0.001 (SAH vs sham), P<0.001 (OE vs Vector); $\eta^2=0.8985$   | Two-tailed |
| Fig 6c | Relative level of C1q                    | 12h     | in vivo | Ordinary<br>one-way          |      | F(3,20)=46.58, P<0.001;<br>Tukey's post hoc test, P<0.001 (SAH vs                                                  | Two-tailed |

|        |                                       |          |                        |                                                                                                                                                                                                                               |            |
|--------|---------------------------------------|----------|------------------------|-------------------------------------------------------------------------------------------------------------------------------------------------------------------------------------------------------------------------------|------------|
| Fig 7d | Relative level of 12h exosomal miR124 | in vitro | ANOVA                  | sham), P<0.001 (OE vs Vector); $\eta^2=0.8527$                                                                                                                                                                                | Two-tailed |
|        |                                       |          | Ordinary one-way ANOVA | F(5,12)=93.1, P<0.001; Tukey's post hoc test, P<0.001 (Control+GW4869 vs Control+Vehicle), P<0.001 (OxyHb vs Control), P<0.001 (OxyHb +Vehicle vs Control+Vehicle), P<0.001 (OxyHb+GW4869 vs OxyHb +Vehicle); $\eta^2=0.9749$ |            |

**Supplemental Table 3. Modeling situation.**

| Groups                     | Mortality Rate | Excluded |
|----------------------------|----------------|----------|
| <b>Experiment 1</b>        |                |          |
| sham                       | 0% (0/12)      | 0        |
| SAH (3h,6h,12h,24h,72h,1w) | 15.6% (14/90)  | 4        |
| <b>Experiment 2</b>        |                |          |
| sham                       | 0% (0/12)      | 0        |
| SAH                        | 12.5% (2/16)   | 2        |
| SAH+Vector                 | 25% (4/16)     | 0        |
| SAH+OE                     | 22.2% (4/18)   | 2        |
| <b>Experiment 3</b>        |                |          |
| sham                       | 0% (0/10)      | 0        |
| SAH                        | 21.4% (3/14)   | 1        |
| SAH+Vector                 | 14.3% (2/14)   | 2        |
| SAH+OE                     | 15.4% (2/13)   | 1        |
| <b>Total</b>               |                |          |
| sham                       | 0% (0/34)      | 0        |

SAH

17.1% (29/181)

12

---
